# Supplementary material
Source: publisher figshare collection journal article supplement (https://acs.figshare.com/ndownloader/files/4728199)
Supplement: Supplementary file 1 [file 4728199]

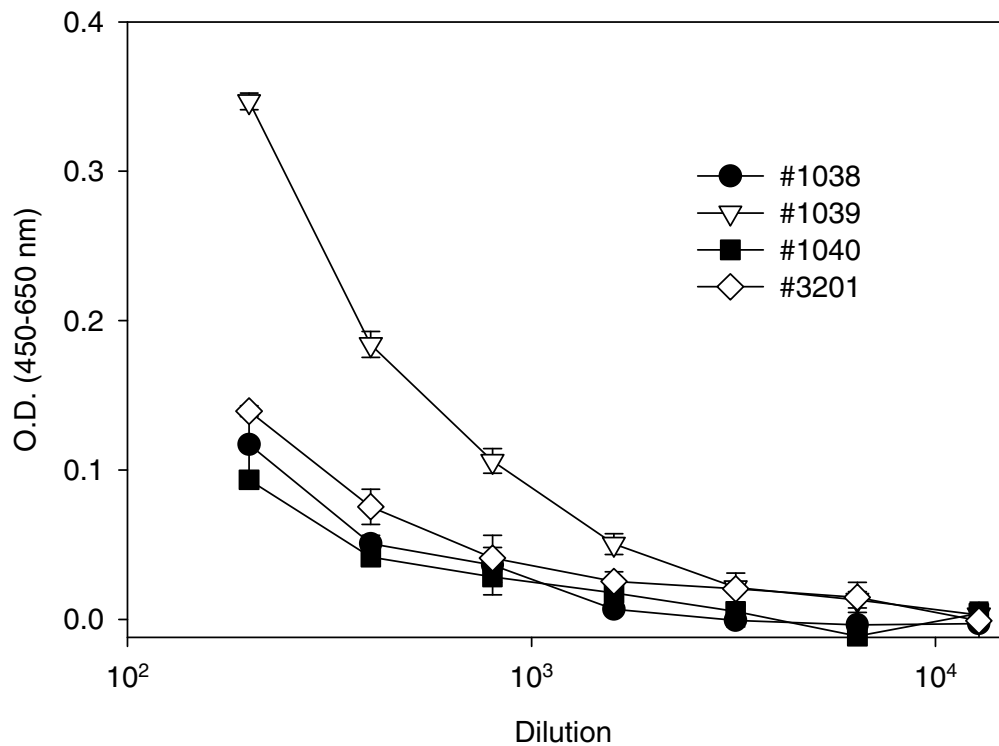

Titration tests of antisera raised against immunogen immunogen I. 96-well microtiter plates were coated with bovine albumin-styrene oxide adducts (20  $\mu\text{g/mL}$ ) and blocked with 5% nonfat milk. The resulting plates were incubated with individual antisera with serial dilutions, followed by adding secondary antibody and substrate sequentially. The absorbance at dual wavelengths (450-650 nm) was read. The values are expressed as mean  $\pm$  SD from triplicate assays.
